# Supplementary material
Source: PubMed Central journal article supplement (PMC2808406)
Supplement: mmc1.pdf [file mmc1.pdf]

**Supplementary Table 1.** Primer Sequences for all 8 SNPs Using iPlex Chemistry on a MassARRAY Platform

| SNP        | Polymerase chain reaction primer 1 sequence | Polymerase chain reaction primer 2 sequence | Extension primer sequence |
|------------|---------------------------------------------|---------------------------------------------|---------------------------|
| rs11209032 | ACGTTGGATGAATTCCTCCCTACATCACCC              | ACGTTGGATGAGGGTGTTTTCTTCAAGCTG              | CCAATTCTTCCATCTGC         |
| rs1343151  | ACGTTGGATGTTGTTTGGTGTGGCAGTTCC              | ACGTTGGATGGGCAAGAAGGAGAAACTCAG              | GAAACTCAGTGCCAATT         |
| rs10889677 | ACGTTGGATGCACCTTCGGGACCTTAATTC              | ACGTTGGATGGGGAGCTCCATGCCTTTTTA              | TTAGCCATTCTTCTGCCT        |
| rs10489629 | ACGTTGGATGATGCCCAGTTTCCGCTTTTG              | ACGTTGGATGCCTGTGTATAAGCTTGTTG               | TTGATTATGATGTCAGCCA       |
| rs11209026 | ACGTTGGATGGGGAATGATCGTCTTTGCTG              | ACGTTGGATGGAAATTCTGCAAAAACCTAC              | CTGCAAAAACCTACCCAGTT      |
| rs1004819  | ACGTTGGATGCTGACCTGCTTTATGCTGTG              | ACGTTGGATGGGCAAAAGAATTATTCTGAGG             | TATGAGAAATGCAGATAGCA      |
| rs1495965  | ACGTTGGATGACTTCTGGCCAAACTTGCTG              | ACGTTGGATGAGAGCAATTTGAGGCTTTGG              | GCTTTGGAAAATGTTCTCTTC     |
| rs11465804 | ACGTTGGATGCAGTATGATGGGTAAAATGG              | ACGTTGGATGTCTACAGGGCACCTTACTTC              | GGCTTTTTGAGTAGTCTTTTAG    |
