# Supplementary material
Source: PubMed Central journal article supplement (PMC2808406)
Supplement: mmc2.pdf [file mmc2.pdf]

**Supplementary Table 2.** Results of Genotyping to Confirm Concordance Between Illumina and MassARRAY Technologies

| SNP                         | rs1004819 | rs10489629 | rs10889677 | rs11209026 | rs11209032 | rs11465804 | rs1343151 | rs1495965 |
|-----------------------------|-----------|------------|------------|------------|------------|------------|-----------|-----------|
| No. of samples genotyped    | 87        | 87         | 87         | 87         | 87         | 87         | 87        | 87        |
| No. of discordant genotypes | 2         | 2          | 0          | 0          | 1          | 0          | 1         | 1         |
| Concordance (%)             | 97.7      | 97.7       | 100        | 100        | 98.9       | 100        | 98.9      | 98.9      |

NOTE. Numbers of discordant genotype calls between platforms are given. The overall concordance rate was 98.99%.
